# Supplementary material for: Biosynthesis of Silver Chloride Nanoparticles by Rhizospheric Bacteria and Their Antibacterial Activity against Phytopathogenic Bacterium Ralstonia solanacearum
Source: MDPI journal article supplement (doi:10.3390/molecules27010224), 2021-12-30
Supplement: s1 [file s1]

**Table S1.** Lipopeptide compounds detected using MALDI-TOF mass spectrometry from bacterial strain IAM13

| <b>Mass peak (m/z)</b> | <b>Lipopeptides</b> | <b>precursor ions [M + X]</b> | <b>Refer.</b>        |
|------------------------|---------------------|-------------------------------|----------------------|
| 1053.547               | C14 bacillomycin D  | [M+Na] <sup>+</sup>           | <a href="#">[21]</a> |
| 1067.553               | C15 bacillomycin D  | [M+Na] <sup>+</sup>           | <a href="#">[21]</a> |
| 1081.580               | C16 bacillomycin D  | [M+Na] <sup>+</sup>           | <a href="#">[21]</a> |
| 1095.606               | C17 bacillomycin D  | [M+Na] <sup>+</sup>           | <a href="#">[21]</a> |
| 1065.593               | C14 iturin          | [M+Na] <sup>+</sup>           | <a href="#">[22]</a> |
| 1079.616               | C15 iturin          | [M+Na] <sup>+</sup>           | <a href="#">[23]</a> |
| 1095.606               | C15 iturin          | [M+K] <sup>+</sup>            | <a href="#">[22]</a> |
| 1109.619               | C16 iturin          | [M+K] <sup>+</sup>            | <a href="#">[23]</a> |
| 1123.628               | C17 iturin          | [M+K] <sup>+</sup>            | <a href="#">[22]</a> |
| 1152.727               | C20 iturin          | [M+Na] <sup>+</sup>           | <a href="#">[22]</a> |
| 1435.875               | C14 fengycin        | [M+H] <sup>+</sup>            | <a href="#">[24]</a> |
| 1449.901               | C15 fengycin        | [M+H] <sup>+</sup>            | <a href="#">[24]</a> |
| 1463.922               | C16 fengycin        | [M+H] <sup>+</sup>            | <a href="#">[24]</a> |
| 1473.844               | C14 fengycin        | [M+K] <sup>+</sup>            | <a href="#">[25]</a> |
| 1477.932               | C17 fengycin        | [M+H] <sup>+</sup>            | <a href="#">[24]</a> |
| 1485.901               | C16 fengycin        | [M+Na] <sup>+</sup>           | <a href="#">[24]</a> |
| 1487.865               | C15 fengycin        | [M+K] <sup>+</sup>            | <a href="#">[25]</a> |
| 1501.886               | C16 fengycin        | [M+K] <sup>+</sup>            | <a href="#">[24]</a> |
| 1515.903               | C17 fengycin        | [M+K] <sup>+</sup>            | <a href="#">[24]</a> |
| 1529.918               | C16 fengycin        | [M+K] <sup>+</sup>            | <a href="#">[24]</a> |
